# Supplementary material for: Large-range Control of the Microstructures and Properties of Three-dimensional Porous Graphene
Source: PubMed Central journal article supplement — Sci Rep. 2013 Jul 2;3:2117. doi: 10.1038/srep02117 (PMC3698491; doi:10.1038/srep02117), 2013-07-02
Supplement: srep02117-s3.pdf [file srep02117-s3.pdf]

## Supplementary Information

### Large-range Control of the Microstructures and Properties of Three-dimensional Porous Graphene

Xiao Xie, Yilong Zhou, Hengchang Bi, Kuibo Yin, Shu Wan and Litao Sun†

SEU-FEI Nano-Pico Center, Key Laboratory of MEMS of Ministry of Education, Southeast University, 210096 Nanjing, China

†To whom correspondence should be addressed. E-mail: slt@seu.edu.cn (L.T.S.).

**Figure S1.** Working flow of tailoring microstructure of graphene sponge by freeze casting.

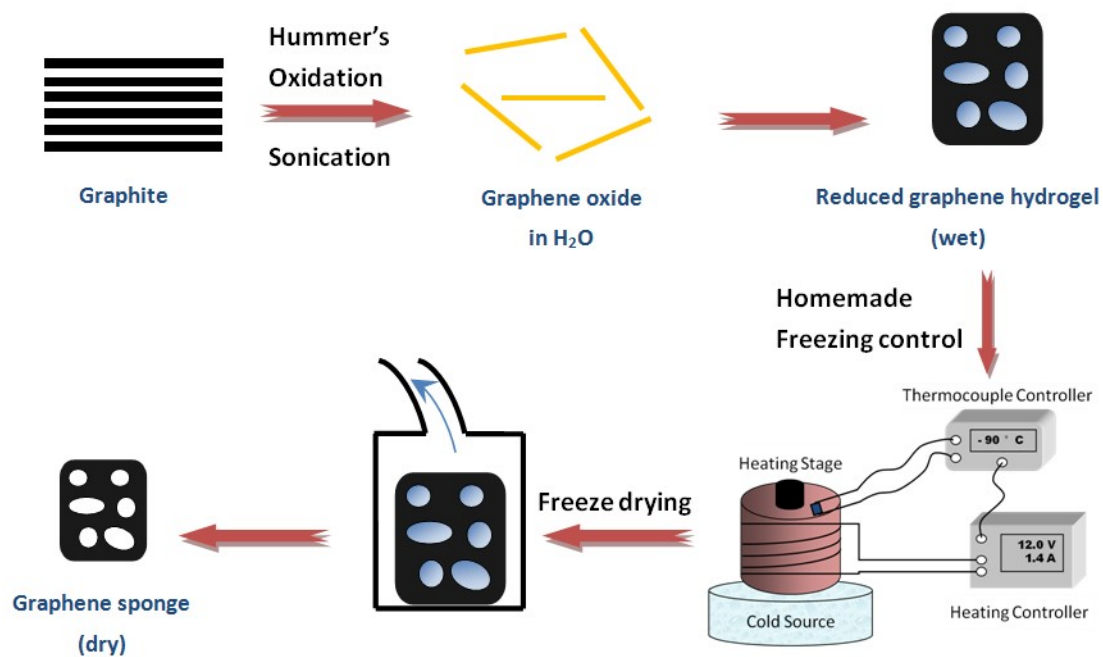

**Figure S2.** Higher magnification SEM images of the graphene walls in the graphene sponges. Freezing temperature: **a**, -10 °C; **b**, -20 °C; **c**, -40 °C; **d**, -50 °C; **e** and **f**, -170 °C, respectively.

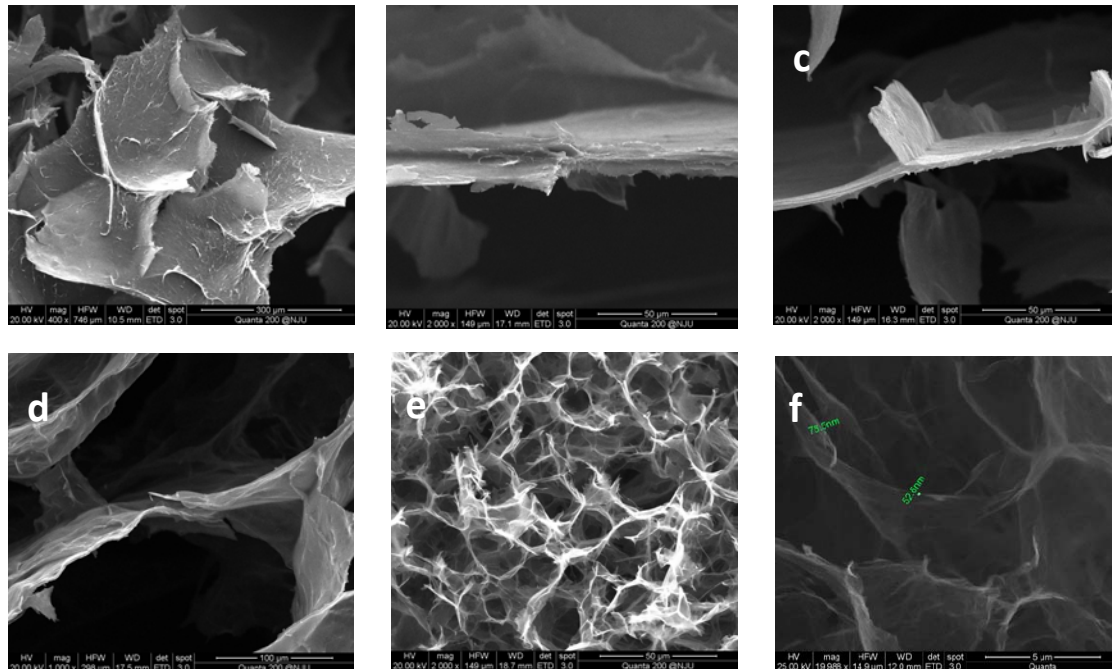

**Figure S3.** The relationship between nucleation/crystal growth and the morphology of the pore. The specimen was frozen at **a**,  $-20\text{ }^{\circ}\text{C}$  and **b**,  $-170\text{ }^{\circ}\text{C}$ , showing **a**, unidirectional, lamellar growth and **b**, diffusive, uniform micropores, respectively.

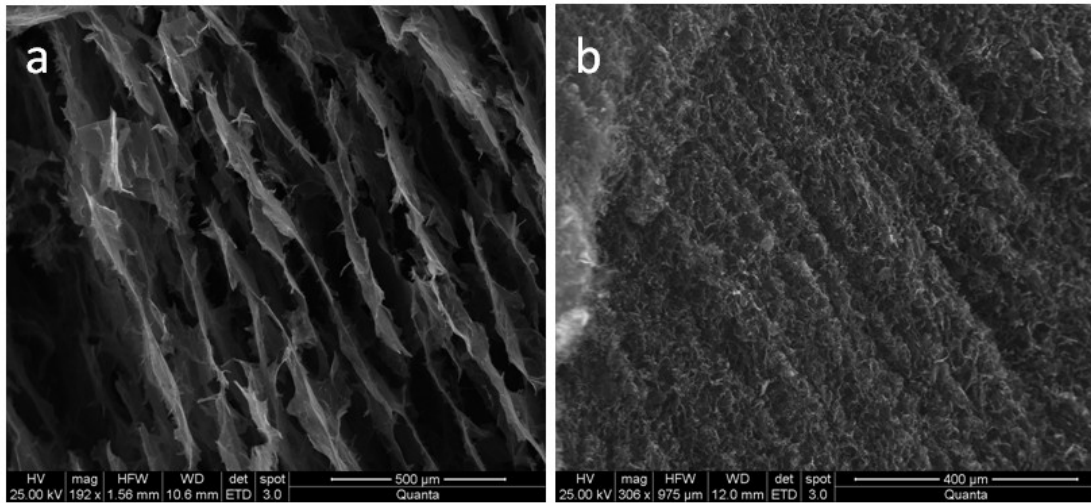

**Figure S4.** XPS spectra of the cross-sectional surfaces of graphene sponges which have been frozen in  $-10\text{ }^{\circ}\text{C}$ ,  $-20\text{ }^{\circ}\text{C}$ ,  $-50\text{ }^{\circ}\text{C}$  and  $-170\text{ }^{\circ}\text{C}$ , respectively. No significant difference in chemical composition has been observed.

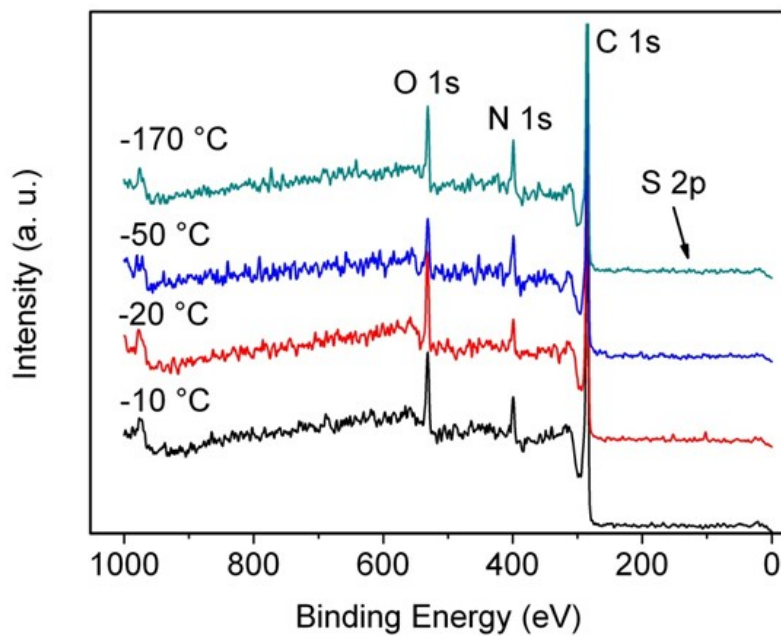

**Movie S1.** Mechanical compression and release of graphene sponge frozen in  $-20\text{ }^{\circ}\text{C}$

**Movie S2.** Mechanical compression and release of graphene sponge frozen in  $-170\text{ }^{\circ}\text{C}$
